# Supplementary material
Source: PubMed Central journal article supplement (PMC5034296)
Supplement: NIHMS771439-supplement-2.pdf [file NIHMS771439-supplement-2.pdf]

**Supplementary Table 1. Solid-state nuclear magnetic resonance experiments**

| Sample            | Experiment                                                                                           | Magnet      | MAS Rate (kHz) | Mixing (ms)                              | Exp Time (hr)                 |
|-------------------|------------------------------------------------------------------------------------------------------|-------------|----------------|------------------------------------------|-------------------------------|
| A                 | 2D $^{13}\text{C}$ - $^{13}\text{C}$ with DARR mixing                                                | 17.6 T (WB) | 12.500         | 25                                       | 4                             |
| A                 | 2D $^{15}\text{N}$ - $\{^{13}\text{CO}\}$ - $^{13}\text{CX}$ with DARR mixing                        | 17.6 T (WB) | 12.500         | 25                                       | 7                             |
| A                 | 2D $^{15}\text{N}$ - $\{^{13}\text{CA}\}$ - $^{13}\text{CX}$ with DARR mixing                        | 17.6 T (WB) | 12.500         | 25                                       | 7                             |
| A                 | 2D $^{13}\text{CA}$ - $\{^{15}\text{N}\}$ - $\{^{13}\text{CO}\}$ - $^{13}\text{CX}$ with DARR mixing | 17.6 T (WB) | 12.500         | 50                                       | 30                            |
| A                 | 3D $^{13}\text{CA}$ - $\{^{15}\text{N}\}$ - $^{13}\text{CO}$                                         | 17.6 T (WB) | 12.500         | N/A                                      | 4                             |
| A                 | 3D $^{15}\text{N}$ - $^{13}\text{CA}$ - $^{13}\text{CX}$ with DARR mixing                            | 17.6 T (WB) | 12.500         | 50                                       | 58                            |
| A                 | 3D $^{15}\text{N}$ - $^{13}\text{CO}$ - $^{13}\text{CX}$ with DARR mixing                            | 17.6 T (WB) | 12.500         | 50                                       | 29                            |
| B                 | 3D $^{15}\text{N}$ - $^{13}\text{CO}$ - $^{13}\text{CX}$ with DARR mixing                            | 11.7 T (WB) | 11.111         | 500                                      | 181                           |
| B                 | 2D $^{13}\text{C}$ - $^{13}\text{C}$ with DARR mixing                                                | 11.7 T (WB) | 11.111         | 500                                      | 65                            |
| B                 | 2D $^{13}\text{C}$ - $^{13}\text{C}$ with DARR mixing                                                | 11.7 T (WB) | 11.111         | 150                                      | 50                            |
| B                 | 2D $^{15}\text{N}$ - $^{13}\text{C}$ with TEDOR mixing                                               | 14.1 T (WB) | 10.000         | 1.6, 3.2, 4.8, 6.4, 9.6, 12.8, 16.0      | 9, 13, 13, 9, 13, 13, 13      |
| B                 | 2D $^{15}\text{N}$ - $^{13}\text{C}$ with TEDOR mixing                                               | 14.1 T (WB) | 10.000         | 1.6, 3.2, 4.8, 6.4, 8.0, 9.6, 12.8, 16.0 | 7, 14, 21, 35, 21, 21, 28, 28 |
| B                 | 2D $^{13}\text{C}$ - $^{13}\text{C}$ with DARR mixing                                                | 14.1 T (WB) | 10.000         | 500                                      | 18                            |
| B                 | 3D $^{15}\text{N}$ - $^{13}\text{CO}$ - $^{13}\text{CX}$ with DARR mixing                            | 14.1 T (WB) | 13.333         | 500                                      | 159                           |
| B                 | 2D $^{13}\text{C}$ - $^{13}\text{C}$ with DARR mixing                                                | 14.1 T (WB) | 13.333         | 750                                      | 61                            |
| B                 | 2D $^{13}\text{C}$ - $^{13}\text{C}$ with DARR mixing                                                | 14.1 T (WB) | 10.000         | 50, 100, 200, 300, 400, 500              | 22, 11, 12, 19, 33, 42        |
| B                 | 2D $^{13}\text{C}$ - $^{13}\text{C}$ with DARR mixing                                                | 17.6 T (NB) | 12.500         | 50, 100, 200, 300, 400, 500              | 11, 6, 12, 13, 13, 14         |
| B                 | 3D $^{15}\text{N}$ - $^{13}\text{CO}$ - $^{13}\text{CX}$ with DARR mixing                            | 17.6 T (NB) | 12.500         | 50                                       | 11                            |
| B                 | 3D $^{15}\text{N}$ - $^{13}\text{CO}$ - $^{13}\text{CX}$ with DARR mixing                            | 17.6 T (NB) | 12.500         | 100                                      | 24                            |
| B                 | 3D $^{15}\text{N}$ - $^{13}\text{CO}$ - $^{13}\text{CX}$ with DARR mixing                            | 17.6 T (NB) | 12.500         | 200                                      | 25                            |
| B                 | 3D $^{15}\text{N}$ - $^{13}\text{CO}$ - $^{13}\text{CX}$ with DARR mixing                            | 17.6 T (NB) | 12.500         | 300                                      | 26                            |
| C                 | 3D $^{15}\text{N}$ - $^{13}\text{CA}$ - $^{13}\text{CX}$ with DARR mixing                            | 11.7 T (WB) | 11.111         | 500                                      | 152                           |
| C                 | 2D $^{13}\text{C}$ - $^{13}\text{C}$ with DARR mixing                                                | 14.1 T (WB) | 10.000         | 100, 200, 300, 400, 500                  | 17, 18, 18, 30, 48            |
| C                 | 2D $^{15}\text{N}$ - $^{13}\text{C}$ with TEDOR mixing                                               | 14.1 T (WB) | 10.000         | 1.6, 3.2, 4.8, 6.4, 9.6, 12.8, 16.0      | 17, 22, 30, 22, 30, 113       |
| C                 | 3D $^{15}\text{N}$ - $^{13}\text{CA}$ - $^{13}\text{CX}$ with DARR mixing                            | 17.6 T (WB) | 12.500         | 500                                      | 88                            |
| C                 | 3D $^{15}\text{N}$ - $^{13}\text{CO}$ - $^{13}\text{CX}$ with DARR mixing                            | 17.6 T (WB) | 12.500         | 500                                      | 35                            |
| C                 | 3D $^{13}\text{CA}$ - $^{15}\text{N}$ - $^{13}\text{CO}$                                             | 17.6 T (WB) | 12.500         | N/A                                      | 19                            |
| C                 | 2D $^{13}\text{C}$ - $^{13}\text{C}$ with DARR mixing                                                | 17.6 T (WB) | 12.500         | 250                                      | 2                             |
| C                 | 2D $^{13}\text{C}$ - $^{13}\text{C}$ with DARR mixing                                                | 17.6 T (WB) | 12.500         | 500                                      | 22                            |
| C                 | 3D $^{13}\text{C}$ - $^{13}\text{C}$ - $^{13}\text{C}$ with DARR mixing                              | 17.6 T (WB) | 12.500         | 250, 500                                 | 306                           |
| C                 | 3D $^{15}\text{N}$ - $^{13}\text{CA}$ - $^{13}\text{CX}$ with DARR mixing                            | 17.6 T (WB) | 12.500         | 750                                      | 230                           |
| C                 | 3D $^{15}\text{N}$ - $^{13}\text{CO}$ - $^{13}\text{CX}$ with DARR mixing                            | 17.6 T (WB) | 12.500         | 750                                      | 100                           |
| D                 | 2D $^{13}\text{C}$ - $^{13}\text{C}$ with 1H-1H mixing                                               | 17.6 T (WB) | 12.500         | 0.4                                      | 283                           |
| D                 | 2D $^{13}\text{C}$ - $^{13}\text{C}$ with DARR mixing                                                | 17.6 T (WB) | 12.500         | 50                                       | 20                            |
| E                 | 2D $^{15}\text{N}$ - $^{13}\text{C}$ with TEDOR mixing                                               | 11.7 T (WB) | 11.111         | 14.4                                     | 81                            |
| F                 | 2D $^{15}\text{N}$ - $^{13}\text{C}$ with TEDOR mixing                                               | 11.7 T (WB) | 11.111         | 14.4                                     | 124                           |
| <b>Total Time</b> |                                                                                                      |             |                |                                          | <b>3049</b>                   |
